# Supplementary material for: The loading of coordination complex modified polyoxometalate nanobelts on activated carbon fiber: a feasible strategy to obtain visible light active and highly efficient polyoxometalate based photocatalysts
Source: Royal Society of Chemistry journal article supplement (doi:10.1039/c4dt03092c), 2014-12-22
Supplement: c4dt03092c1.pdf [file c4dt03092c1.pdf]

## Electronic Supplementary Information (ESI)

### **The Loading of Coordination Complex Modified Polyoxometalate Nanobelts on Activated Carbon Fiber: a Feasible Strategy to Obtain Visible Light Active and High Efficient Polyoxometalate Based Photocatalyst**

**Tingting Lu<sup>a</sup>, Xinxin Xu<sup>\*a</sup>, Huili Li<sup>b</sup>, Zhenyu Li<sup>a</sup>, Xia Zhang<sup>\*a</sup>, Jinzhao Ou<sup>a</sup>, Mingliang Mei<sup>a</sup>**

*<sup>a</sup> Department of Chemistry, College of Science, Northeast University, Shenyang, Liaoning, 110819, People's Republic of China*

*<sup>b</sup> Analytic and Testing center, Research Academy, Northeast University, Shenyang, Liaoning, 110819, People's Republic of China*

**Table S1.** Crystal data and structure refinement results for **ZnSiW<sub>11</sub>**

|                                                     |                                                                                      |
|-----------------------------------------------------|--------------------------------------------------------------------------------------|
| Empirical formula                                   | C <sub>48</sub> H <sub>55</sub> N <sub>12</sub> O <sub>46</sub> SiW <sub>11</sub> Zn |
| Formula weight                                      | 3651.77                                                                              |
| Crystal system                                      | Triclinic                                                                            |
| Space group                                         | <i>P</i> -1                                                                          |
| <i>a</i> /Å                                         | 13.1329(6)                                                                           |
| <i>b</i> /Å                                         | 14.3222(6)                                                                           |
| <i>c</i> /Å                                         | 23.9745(10)                                                                          |
| $\alpha$ /°                                         | 77.7510(10)                                                                          |
| $\beta$ /°                                          | 79.0530(10)                                                                          |
| $\gamma$ /°                                         | 66.4830(10)                                                                          |
| <i>V</i> /Å <sup>3</sup>                            | 4012.8(3)                                                                            |
| <i>Z</i>                                            | 2                                                                                    |
| <i>D</i> <sub>calcd</sub> /(g cm <sup>-3</sup> )    | 2.948                                                                                |
| Reflections collected                               | 19455                                                                                |
| Reflections unique                                  | 13427                                                                                |
| R(int)                                              | 0.0255                                                                               |
| Goodness - of - fit on F <sup>2</sup>               | 1.030                                                                                |
| <i>R</i> <sub>1</sub> [ <i>I</i> > 2σ( <i>I</i> )]  | 0.0556                                                                               |
| <i>wR</i> <sub>2</sub> [ <i>I</i> > 2σ( <i>I</i> )] | 0.1663                                                                               |
| <i>R</i> <sub>1</sub> (all data)                    | 0.0663                                                                               |
| <i>wR</i> <sub>2</sub> (all data)                   | 0.1762                                                                               |

Note.  $R_1 = \Sigma||F_o| - |F_c||/\Sigma|F_o|$ ;  $wR_2 = \Sigma[w(F_o^2 - F_c^2)^2]/\Sigma[w(F_o^2)^2]^{1/2}$

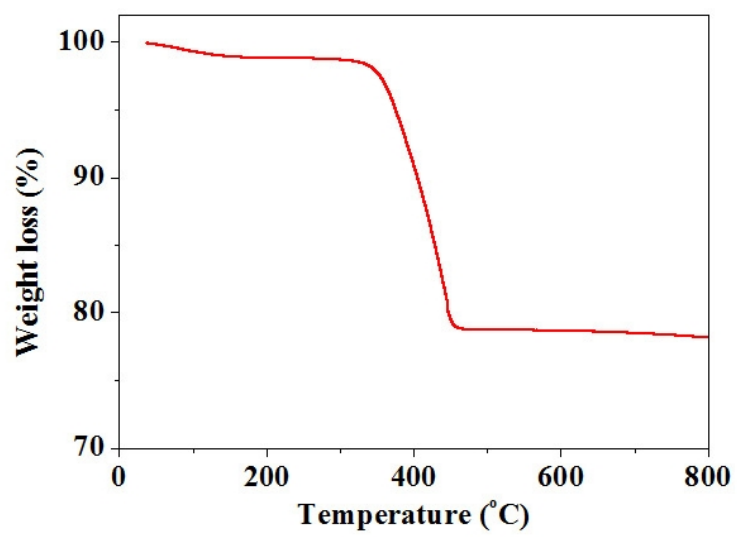

**Figure S1.** TGA curve of ZnSiW<sub>11</sub>NB.

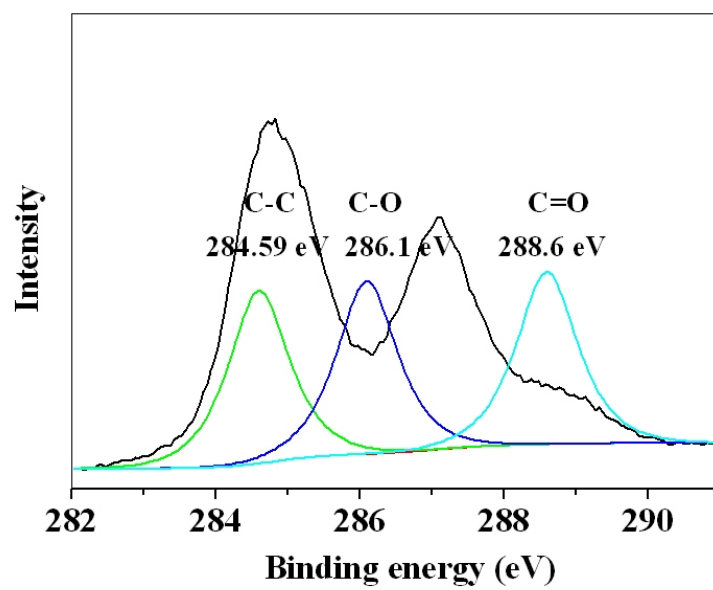

**Figure S2.** XPS spectrum of ACF (C1s peak of ACF).

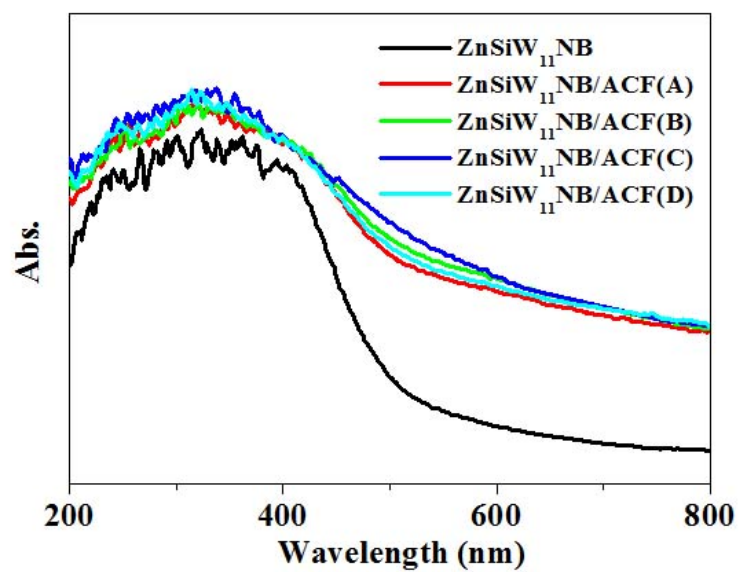

**Figure S3.** DRS of ZnSiW<sub>11</sub>NB and ZnSiW<sub>11</sub>NB/ACF composite materials.

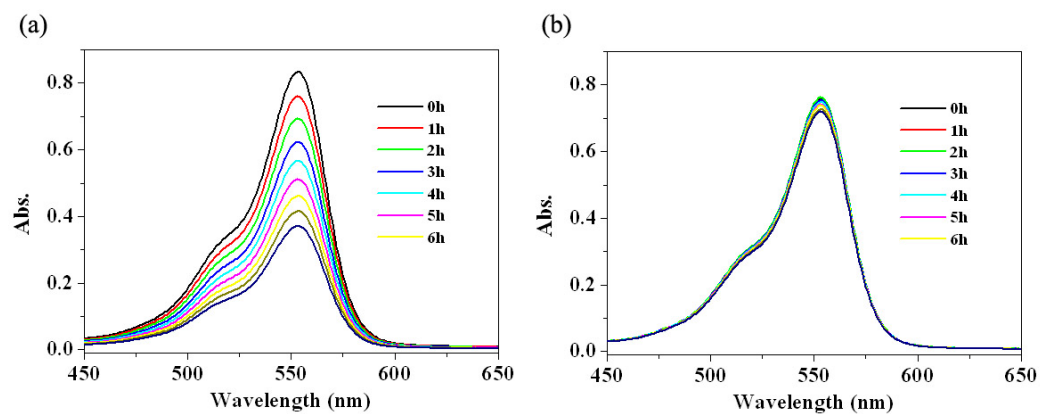

**Figure S4.** Absorption spectra of RhB degraded with  $\text{ZnSiW}_{11}\text{NB}$ : (a) under irradiation of ultraviolet light; (b) under irradiation of visible light.

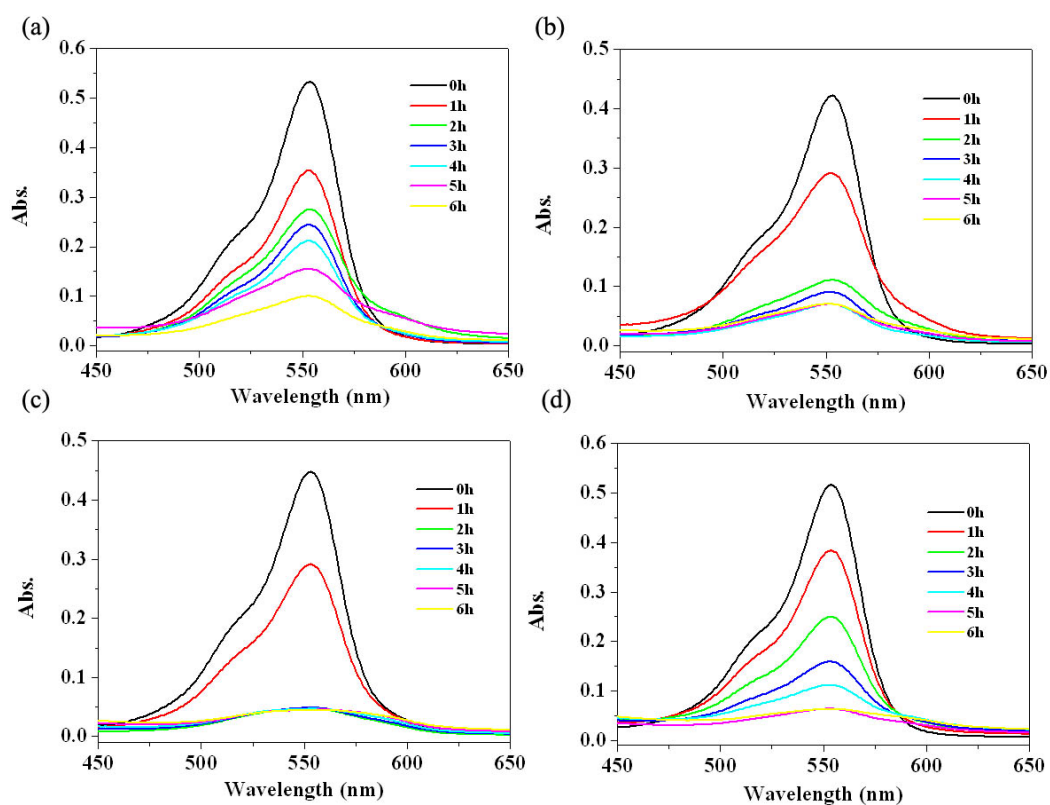

**Figure S5.** Absorption spectra of RhB degraded with  $\text{ZnSiW}_{11}\text{NB/ACF}$ : (a)  $\text{ZnSiW}_{11}\text{NB/ACF(A)}$ ; (b)  $\text{ZnSiW}_{11}\text{NB/ACF(B)}$ ; (c)  $\text{ZnSiW}_{11}\text{NB/ACF(C)}$ ; (d)  $\text{ZnSiW}_{11}\text{NB/ACF(D)}$ .

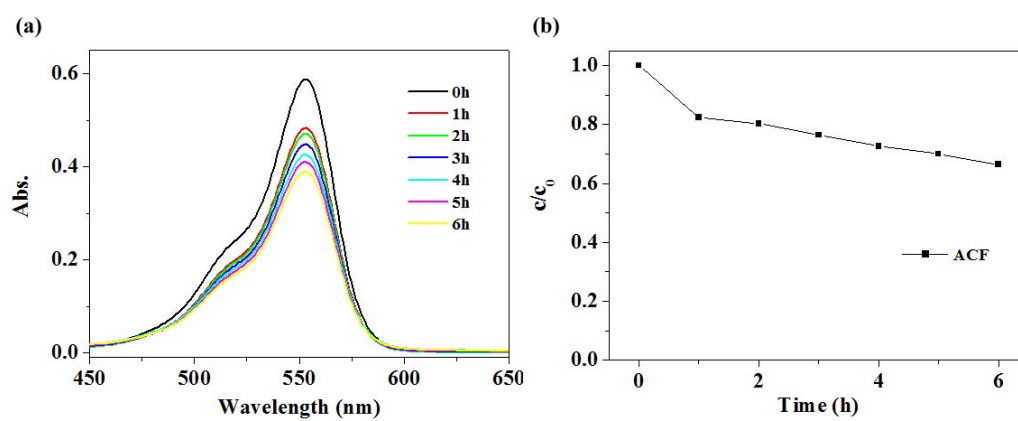

**Figure S6.** Absorption spectra of RhB degraded with ACF.

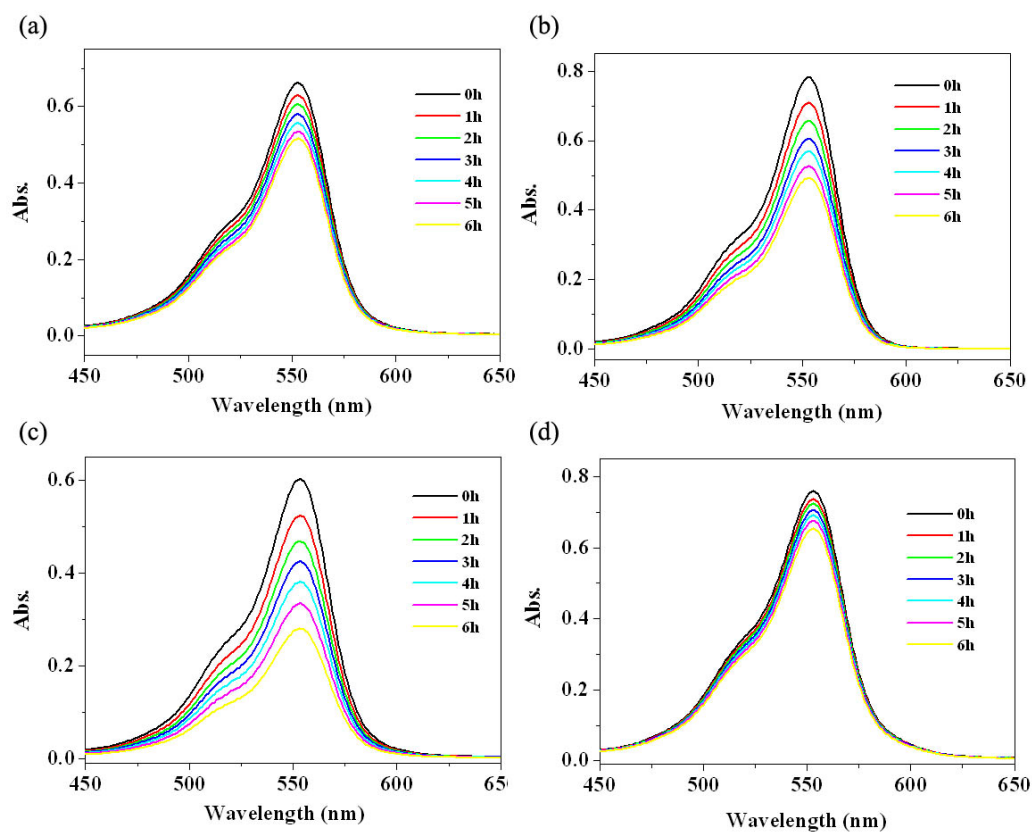

**Figure S7.** Absorption spectra of RhB degraded with **ZnSiW<sub>11</sub>NB/ACFM**: (a) **ZnSiW<sub>11</sub>NB/ACF(A)M**; (b) **ZnSiW<sub>11</sub>NB/ACF(B)M**; (c) **ZnSiW<sub>11</sub>NB/ACF(C)M**; (d) **ZnSiW<sub>11</sub>NB/ACF(D)M**.
